# Supplementary material for: PtMn/PtCo alloy nanofascicles: robust electrocatalysts for electrocatalytic hydrogen evolution reaction under both acidic and alkaline conditions
Source: Royal Society of Chemistry journal article supplement (doi:10.1039/d0qi00961j), 2020-01-01
Supplement: d0qi00961j1.pdf [file d0qi00961j1.pdf]

## **Supporting Information**

### PtMn/PtCo Alloy Nanofascicles: Robust Electrocatalysts for Hydrogen Evolution Reaction under Both Acidic and Alkaline Conditions

Jinwu Hu, Caihong Fang, Xiaomin Jiang, Deliang Zhang, Zhiqing Cui

College of Chemistry and Materials Science, The Key Laboratory of Functional  
Molecular Solids, Ministry of Education, Anhui Laboratory of Molecular-Based  
Materials, Center for Nano Science and Technology, Key Laboratory of  
Electrochemical Clean Energy of Anhui Higher Education Institutes, Anhui Normal  
University, Wuhu, 241000, China

## Characterization

Transmission electron microscopy (TEM) image was obtained using Hitachi HT7700 operating at an accelerating voltage of 120 kV. Scanning electron microscopy (SEM) and energy dispersive X-ray Spectroscopy (EDX) were operated on Hitachi 8100 scanning electron microscope. Elemental mapping was completed using Oxford. X-ray diffractometer (XRD) patterns come from SMART APEX II. The XPS spectra were recorded on Escalab 250Xi. The absorption spectrum was collected on TU 1810. Inductively coupled plasma atomic emission spectroscopy (ICP-AES) was carried out using an Optima 300DV (PerkinElmer) to determine the composition of the alloy nanocrystals and mass of the electrocatalysts dropped on the working electrode.

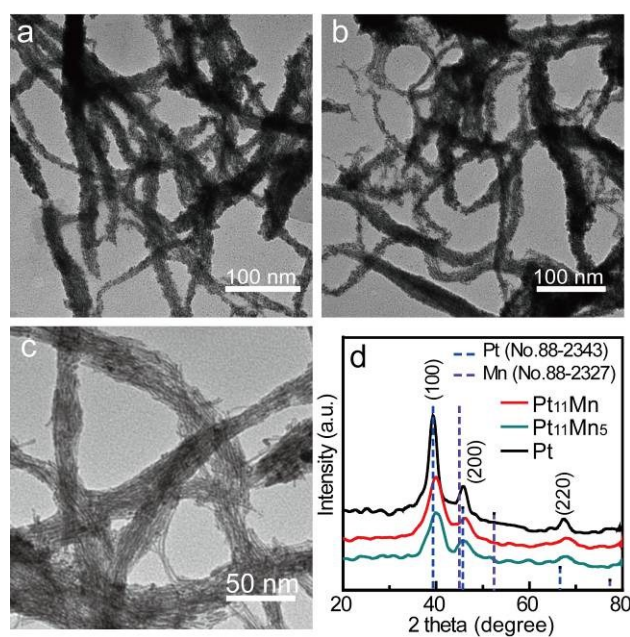

Fig. S1. (a–c) Representative TEM images of the Pt, Pt<sub>11</sub>Mn and Pt<sub>11</sub>Mn<sub>5</sub> nanostructures, respectively. (d) XRD patterns of the Pt, Pt<sub>11</sub>Mn and Pt<sub>11</sub>Mn<sub>5</sub> nanostructures.

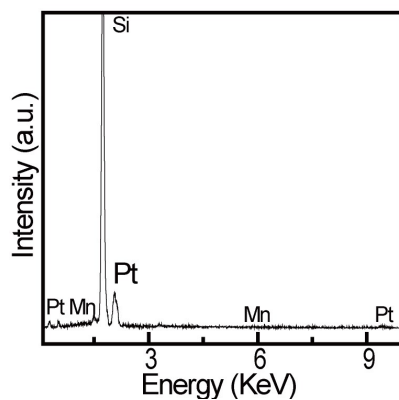

Fig. S2. EDX spectrum of Pt<sub>6</sub>Mn NFs.

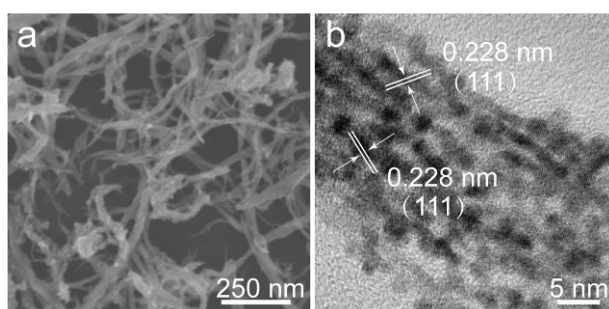

Fig. S3. Representative SEM (a) and HRTEM (b) of Pt<sub>8</sub>Co FNFs, respectively.

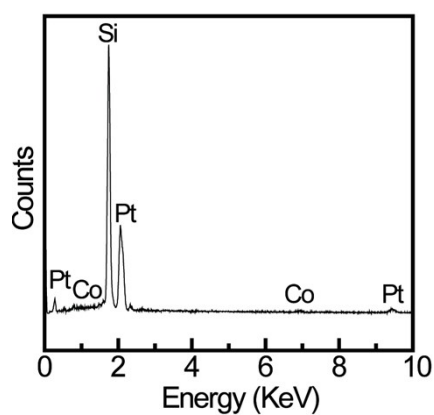

Fig. S4. EDX spectrum of Pt<sub>8</sub>Co NFs.

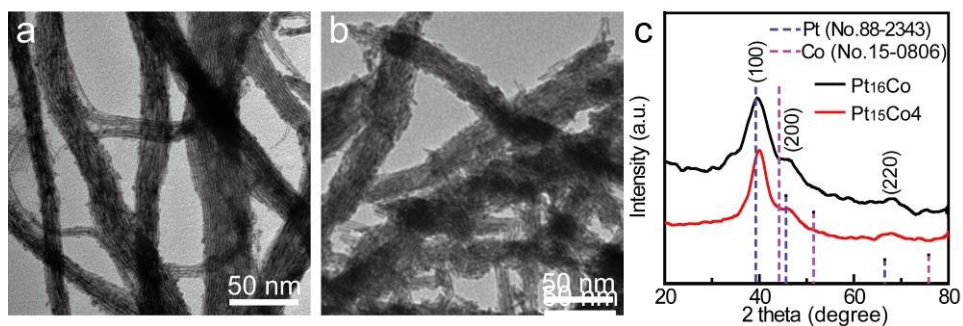

Fig. S5. (a,b) TEM images of Pt<sub>16</sub>Co, and Pt<sub>15</sub>Co<sub>4</sub> nanocrystals, respectively. (c) XRD pattern of the Pt<sub>16</sub>Co, and Pt<sub>15</sub>Co<sub>4</sub> nanocrystals.

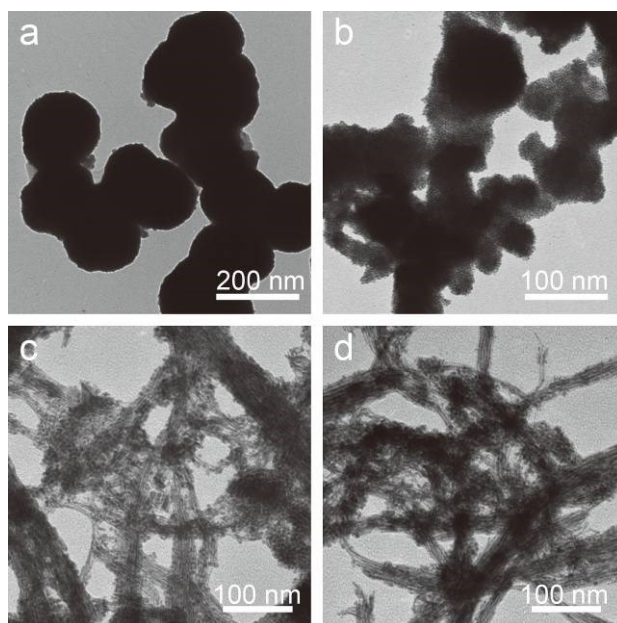

Fig. S6. TEM images of  $\text{Pt}_6\text{Mn}$  synthesized in varied amount of KOH of (a) 0 g, (b) 0.1 g, (c) 0.2 g, and (d) 0.3 g.

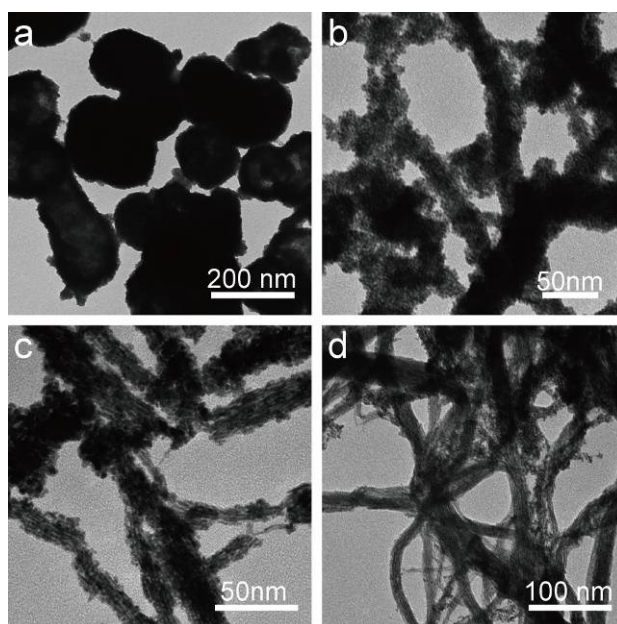

Fig. S7. TEM images of  $\text{Pt}_8\text{Co}$  with different amount of KOH of (a) 0 g, (b) 0.1 g, (c) 0.2 g, and (d) 0.3 g.

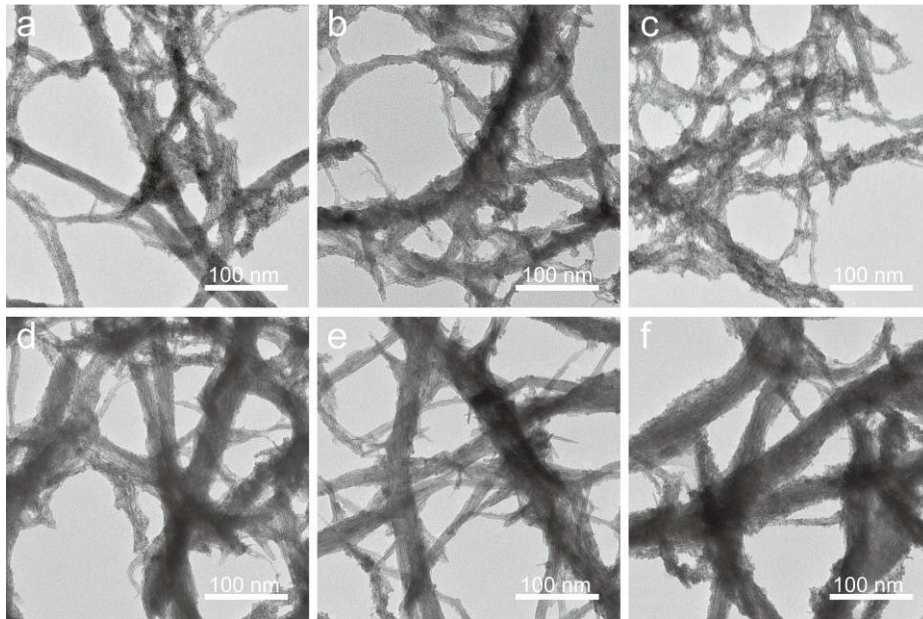

Fig. 8. (a–f) TEM images of PtCo alloy NFs synthesized with different reaction times of 10 min, 20 min, 30 min, 45 min, 1 h and 2 h, respectively.

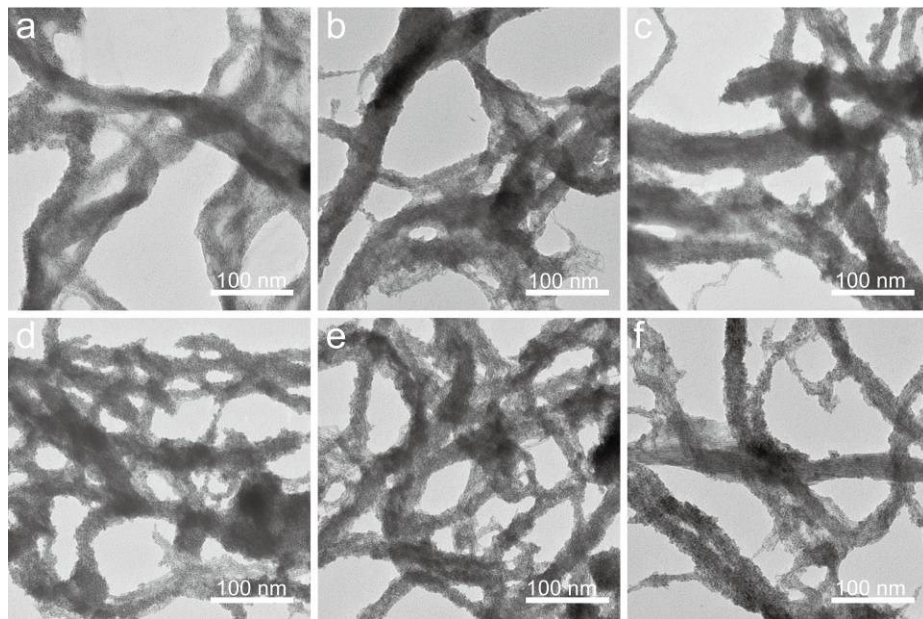

Fig. 9. (a–f) TEM images of PtMn alloy NFs synthesized with different reaction times of 10 min, 20 min, 30 min, 45 min, 1 h and 2 h, respectively.



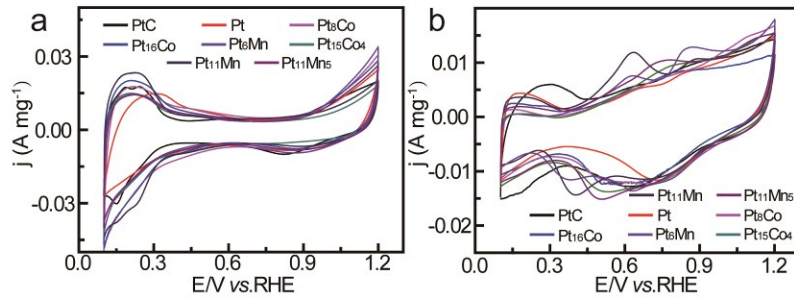

Fig. S10. (a,b) CV curves of Pt<sub>16</sub>Co, Pt<sub>8</sub>Co, Pt<sub>15</sub>Co<sub>4</sub>, Pt<sub>11</sub>Mn, Pt<sub>6</sub>Mn, Pt<sub>11</sub>Mn<sub>5</sub> Pt, and commercial Pt/C in acid (H<sub>2</sub>SO<sub>4</sub>, 0.5 M) and alkaline solution (KOH, 1.0 M), respectively.

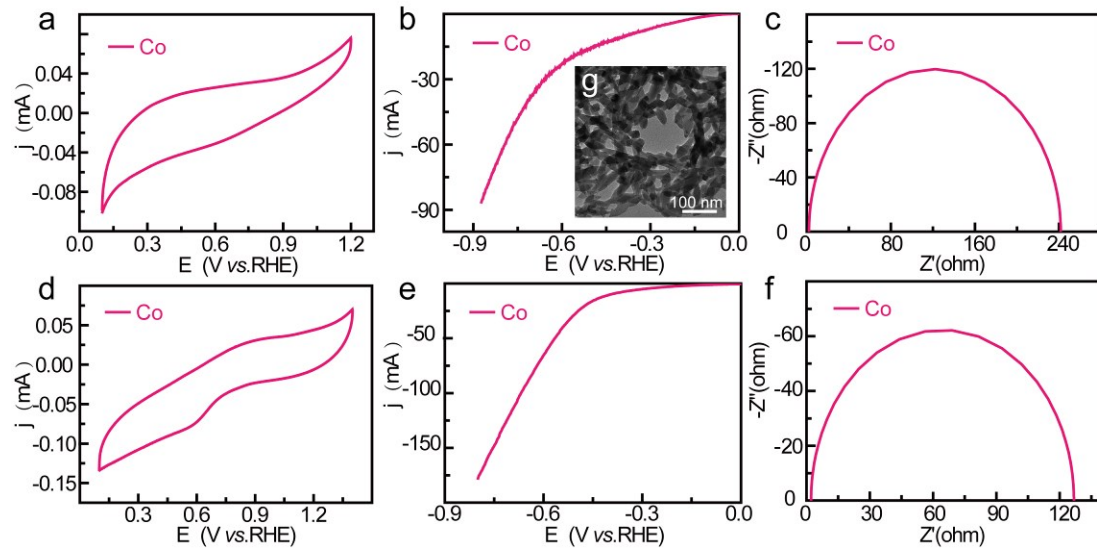

Fig. S11. CV curves, LSV polarization curves, and Nyquist plots of Co nanostructures measured in H<sub>2</sub>SO<sub>4</sub> (0.5 M) (a–c), and KOH (1.0 M) (d–f), respectively.

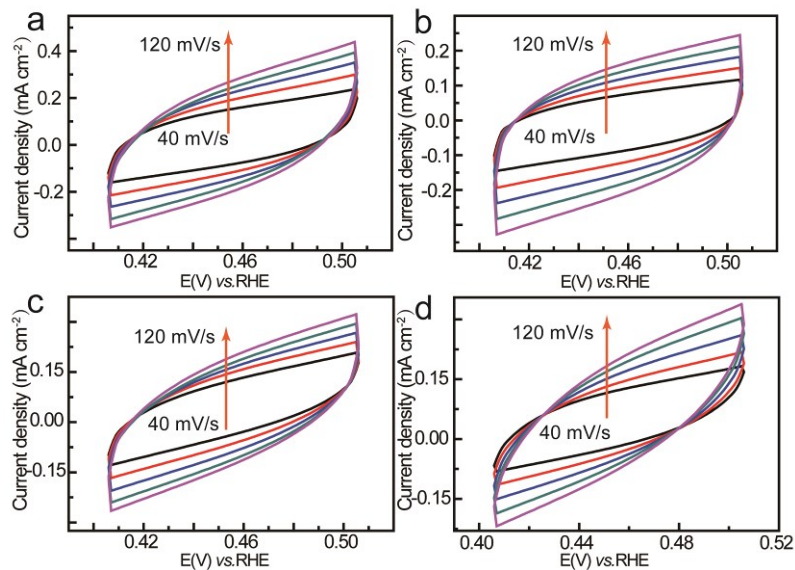

Fig. S12. (a–d) CV polarization curves of Pt<sub>16</sub>Co, Pt<sub>15</sub>Co<sub>4</sub>, Pt, and commercial Pt/C in the nonfaradaic region with scan rates from 40 to 120 mV s<sup>-1</sup> in H<sub>2</sub>SO<sub>4</sub> (0.5 M), respectively.

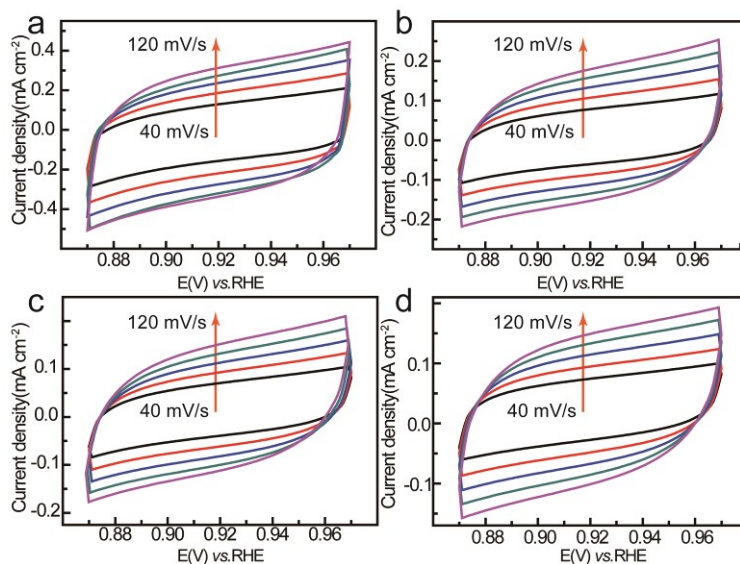

Fig. S13. (a–d) CV polarization curves of Pt<sub>16</sub>Co, Pt<sub>15</sub>Co<sub>4</sub>, Pt and commercial Pt/C in the nonfaradaic region with scan rates from 40 to 120 mV s<sup>-1</sup> in KOH (1.0 M), respectively.

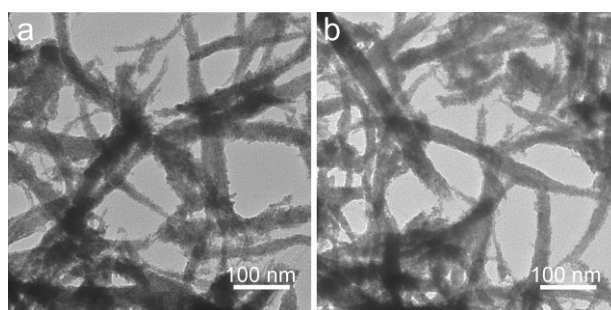

Fig. S14. (a,b) TEM images of the Pt<sub>8</sub>Co electrocatalysts after CA tests in the acidic and alkaline condition, respectively.

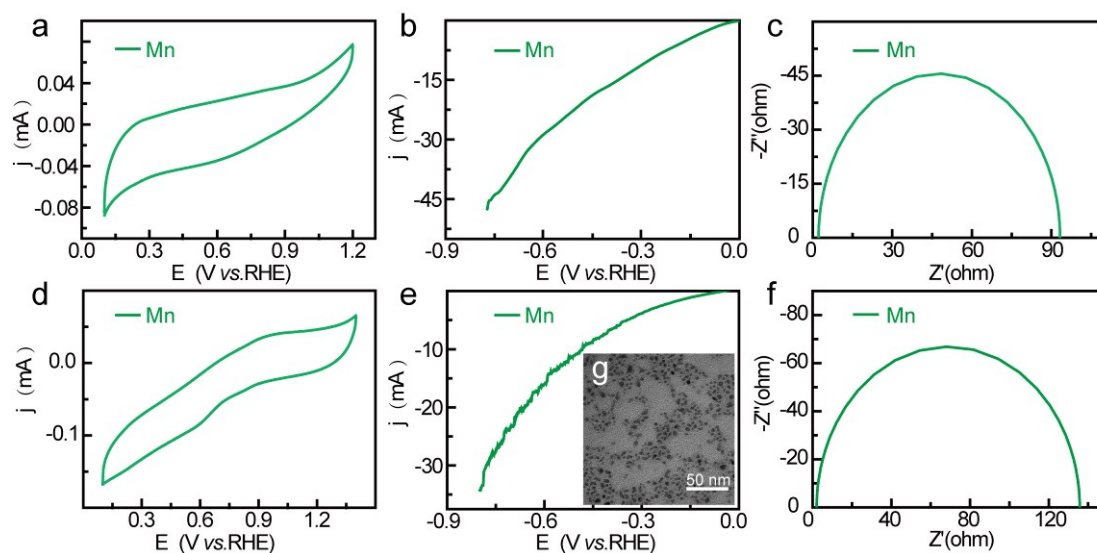

Fig. S15. CV curves, LSV polarization curves, and Nyquist plots of Mn nanocrystals in  $\text{H}_2\text{SO}_4$  (0.5 M) (a–c), and KOH (1.0 M) (d–f), respectively.

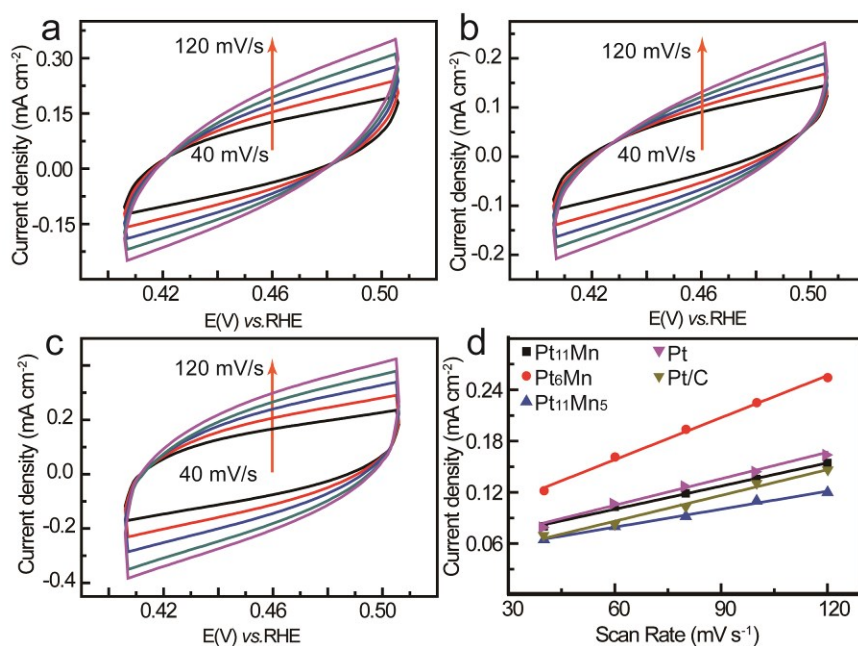

Fig. S16. (a–c) CV polarization curves of  $\text{Pt}_{11}\text{Mn}$ ,  $\text{Pt}_{11}\text{Mn}_5$ , and  $\text{Pt}_6\text{Mn}$  NFs in the nonfaradaic region with scan rates from 40 to 120  $\text{mV s}^{-1}$  in  $\text{H}_2\text{SO}_4$  (0.5 M), respectively. (d) Double-layer capacitance ( $C_{dl}$ ) plots of  $\text{Pt}_{11}\text{Mn}$ ,  $\text{Pt}_6\text{Mn}$ ,  $\text{Pt}_{11}\text{Mn}_5$ , Pt, and commercial Pt/C nanostructures in  $\text{H}_2\text{SO}_4$  (0.5 M).



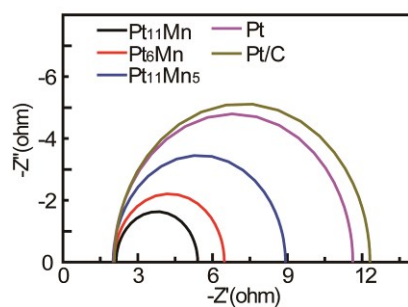

Fig. S17. Nyquist plots of  $\text{Pt}_{11}\text{Mn}$ ,  $\text{Pt}_6\text{Mn}$ ,  $\text{Pt}_{11}\text{Mn}_5$ , Pt and commercial Pt/C measured in  $\text{H}_2\text{SO}_4$  (0.5 M).

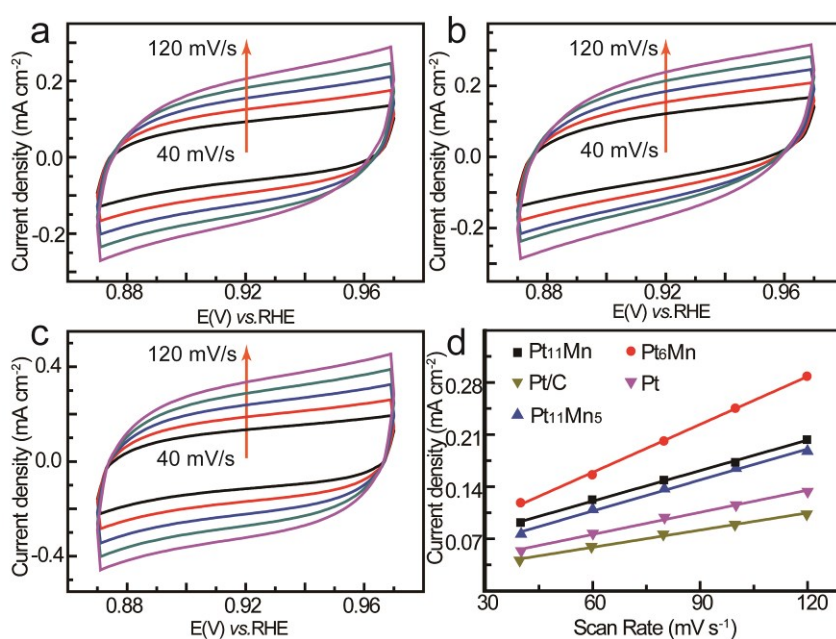

Fig. S18. (a–c) CV polarization curves of  $\text{Pt}_{11}\text{Mn}$ ,  $\text{Pt}_{11}\text{Mn}_5$ , and  $\text{Pt}_6\text{Mn}$  in the nonfaradaic region with scan rates from 40 to  $120 \text{ mV s}^{-1}$  acquired in alkaline electrolyte (KOH, 1.0 M). (d)  $C_{dl}$  plots of  $\text{Pt}_{11}\text{Mn}$ ,  $\text{Pt}_6\text{Mn}$ ,  $\text{Pt}_{11}\text{Mn}_5$ , Pt nanocrystals, and commercial Pt/C in alkaline (KOH, 1.0 M).

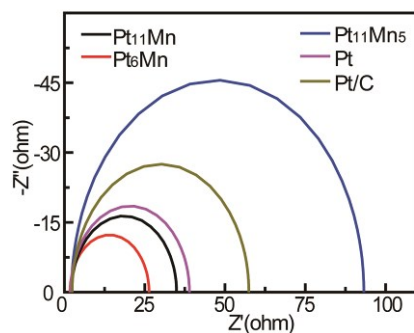

Fig. S19. Nyquist plots of Pt<sub>11</sub>Mn, Pt<sub>6</sub>Mn, Pt<sub>11</sub>Mn<sub>5</sub>, Pt and commercial Pt/C in KOH (1.0 M).

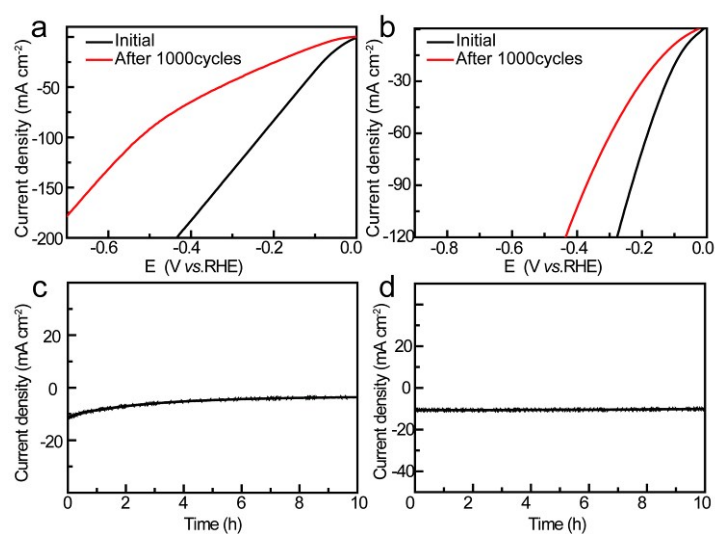

Fig. S20. (a,b) Durability test of Pt<sub>6</sub>Mn electrocatalysts before and after 1000 cycles in H<sub>2</sub>SO<sub>4</sub> (0.5 M) and KOH (1.0 M), respectively. (c,d) CA curves of Pt<sub>6</sub>Mn NFs in H<sub>2</sub>SO<sub>4</sub> (0.5 M) and KOH (1.0 M) at a scan rate of 50 mV s<sup>-1</sup>, respectively.

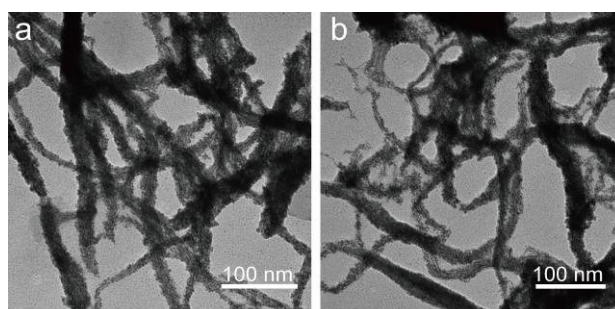

Fig. S21. (a,b) TEM images of the Pt<sub>8</sub>Co electrocatalysts after CA tests in both the acidic and alkaline conditions, respectively.

Table S1. ICP-AES data of PtCo and PtMn nanostructures.

| <b>Catalyst</b>                  | <b>Concentration (Pt)</b><br>( $\mu\text{g/L}$ ) | <b>Concentration (Co)</b><br>( $\mu\text{g/L}$ ) | <b>Concentration (Mn)</b><br>( $\mu\text{g/L}$ ) |
|----------------------------------|--------------------------------------------------|--------------------------------------------------|--------------------------------------------------|
| Pt <sub>16</sub> Co              | 31.7                                             | 1.97                                             |                                                  |
| Pt <sub>8</sub> Co               | 32                                               | 4.05                                             |                                                  |
| Pt <sub>15</sub> Co <sub>4</sub> | 31.1                                             | 8.3                                              |                                                  |
| Pt <sub>11</sub> Mn              | 30                                               |                                                  | 2.92                                             |
| Pt <sub>6</sub> Mn               | 37.1                                             |                                                  | 6.3                                              |
| Pt <sub>11</sub> Mn <sub>5</sub> | 36.5                                             |                                                  | 16.35                                            |
| Pt                               | 35.5                                             |                                                  |                                                  |
| Co                               |                                                  | 8.9                                              |                                                  |
| Mn                               |                                                  |                                                  | 17.8                                             |

Table S2. ECSA of commercial Pt, Pt/C, Pt<sub>16</sub>Co, Pt<sub>8</sub>Co, Pt<sub>15</sub>Co<sub>4</sub>, Pt<sub>11</sub>Mn, Pt<sub>6</sub>Mn and Pt<sub>11</sub>Mn<sub>5</sub> nanocrystals in both acid and alkaline solution.

| <b>Electrocatalyst</b>           | <b>ECSA (<math>\text{m}^2 \text{g}^{-1}</math>)</b> | <b>ECSA (<math>\text{m}^2 \text{g}^{-1}</math>)</b> |
|----------------------------------|-----------------------------------------------------|-----------------------------------------------------|
|                                  | <b>acid solution</b>                                | <b>alkaline solution</b>                            |
| Pt <sub>16</sub> Co              | 16.3                                                | 33.0                                                |
| Pt <sub>8</sub> Co               | 16.18                                               | 35.5                                                |
| Pt <sub>15</sub> Co <sub>4</sub> | 14.7                                                | 41.5                                                |
| Pt <sub>11</sub> Mn              | 17.1                                                | 29.1                                                |
| Pt <sub>6</sub> Mn               | 20.1                                                | 28.9                                                |
| Pt <sub>11</sub> Mn <sub>5</sub> | 19.3                                                | 37.2                                                |
| Pt                               | 18.1                                                | 31.3                                                |
| Pt/C                             | 21.3                                                | 33.7                                                |

Table S3. HER performances of commercial Pt/C, Pt, Pt<sub>16</sub>Co, Pt<sub>8</sub>Co, Pt<sub>15</sub>Co<sub>4</sub>, Pt<sub>11</sub>Mn, Pt<sub>6</sub>Mn, and Pt<sub>11</sub>Mn<sub>5</sub> in acid solution.

| <b>Electrocatalyst</b>           | <b>Onset Potential (mV)</b> | <b><math>\eta_{10}</math> (mV)</b> | <b><math>J_0</math> (mA cm<sup>-2</sup>)</b> | <b>Tafel slope (mV dec<sup>-1</sup>)</b> | <b><math>C_{dl}</math> (mF cm<sup>-2</sup>)</b> |
|----------------------------------|-----------------------------|------------------------------------|----------------------------------------------|------------------------------------------|-------------------------------------------------|
| Pt <sub>16</sub> Co              | 7.9                         | 31.3                               | 0.47                                         | 39                                       | 1.50                                            |
| Pt <sub>8</sub> Co               | 7.7                         | 26.1                               | 0.96                                         | 34                                       | 2.29                                            |
| Pt <sub>15</sub> Co <sub>4</sub> | 21.1                        | 67.8                               | 0.33                                         | 71                                       | 1.20                                            |
| Pt <sub>11</sub> Mn              | 12.3                        | 41.7                               | 0.69                                         | 48                                       | 0.925                                           |
| Pt <sub>6</sub> Mn               | 11.4                        | 39.0                               | 0.89                                         | 38                                       | 1.65                                            |
| Pt <sub>11</sub> Mn <sub>5</sub> | 19.8                        | 67.9                               | 0.35                                         | 56                                       | 0.701                                           |
| Pt                               | 13.3                        | 49.8                               | 0.451                                        | 43.1                                     | 1.059                                           |
| Pt/C                             | 15.7                        | 63.4                               | 0.23                                         | 58                                       | 0.97                                            |

Table S4. HER performances of commercial Pt/C, Pt, Pt<sub>16</sub>Co, Pt<sub>8</sub>Co, Pt<sub>15</sub>Co<sub>4</sub>, Pt<sub>11</sub>Mn, Pt<sub>6</sub>Mn and Pt<sub>11</sub>Mn<sub>5</sub> in alkaline solution.

| <b>Electrocatalyst</b>           | <b>Onset Potential (mV)</b> | <b><math>\eta_{10}</math> (mV)</b> | <b><math>J_0</math> (mA cm<sup>-2</sup>)</b> | <b>Tafel slope (mV dec<sup>-1</sup>)</b> | <b><math>C_{dl}</math> (mF cm<sup>-2</sup>)</b> |
|----------------------------------|-----------------------------|------------------------------------|----------------------------------------------|------------------------------------------|-------------------------------------------------|
| Pt <sub>16</sub> Co              | 27                          | 67.1                               | 0.43                                         | 56                                       | 2.35                                            |
| Pt <sub>8</sub> Co               | 12.9                        | 47.2                               | 1.096                                        | 50                                       | 3.30                                            |
| Pt <sub>15</sub> Co <sub>4</sub> | 32                          | 97.1                               | 0.27                                         | 67                                       | 1.20                                            |
| Pt <sub>11</sub> Mn              | 23.5                        | 81.3                               | 0.320                                        | 74                                       | 1.37                                            |
| Pt <sub>6</sub> Mn               | 26.3                        | 67.5                               | 0.627                                        | 54                                       | 2.45                                            |
| Pt <sub>11</sub> Mn <sub>5</sub> | 19.1                        | 84                                 | 0.228                                        | 84                                       | 1.39                                            |
| Pt                               | 42                          | 104.03                             | 0.25                                         | 89                                       | 0.99                                            |
| Pt/C                             | 56                          | 187.89                             | 0.13                                         | 124                                      | 0.89                                            |
